# Supplementary material for: Bioengineering Case Study to Evaluate Complications of Adverse Anatomy of Aortic Root in Transcatheter Aortic Valve Replacement: Combining Biomechanical Modelling with CT Imaging
Source: MDPI journal article supplement (doi:10.3390/bioengineering7040121), 2020-10-01
Supplement: s1 [file s1]

Supplementary Materials

# Bioengineering Case Study to Evaluate Complications of Adverse Anatomy of Aortic Root in Transcatheter Aortic Valve Replacement: Combining Biomechanical Modelling with CT Imaging

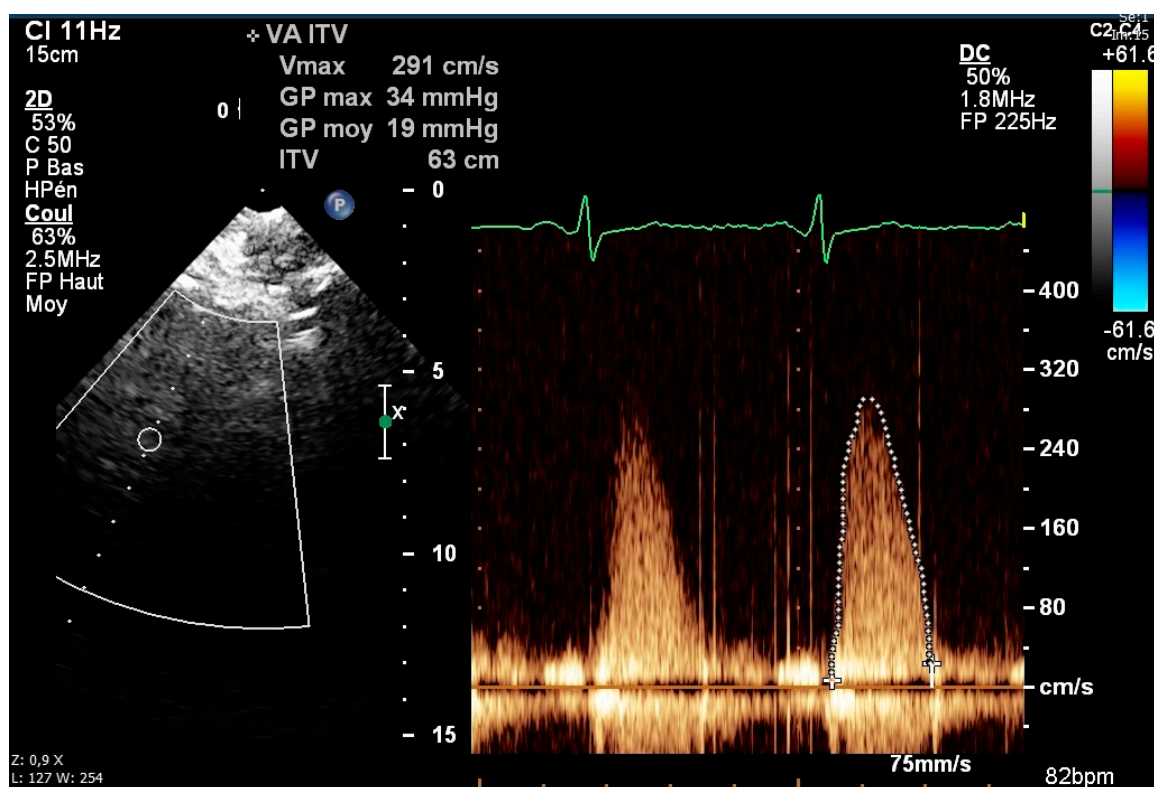

**Figure S1.** The patient presented with acute pulmonary oedema and severe aortic stenosis. She was in NYHA class 4 and had a Euroscore of 19.09. The transthoracic echocardiography showed a calculated aortic area of 0.74 cm<sup>2</sup> and mean systolic gradient of 28 mmHg.

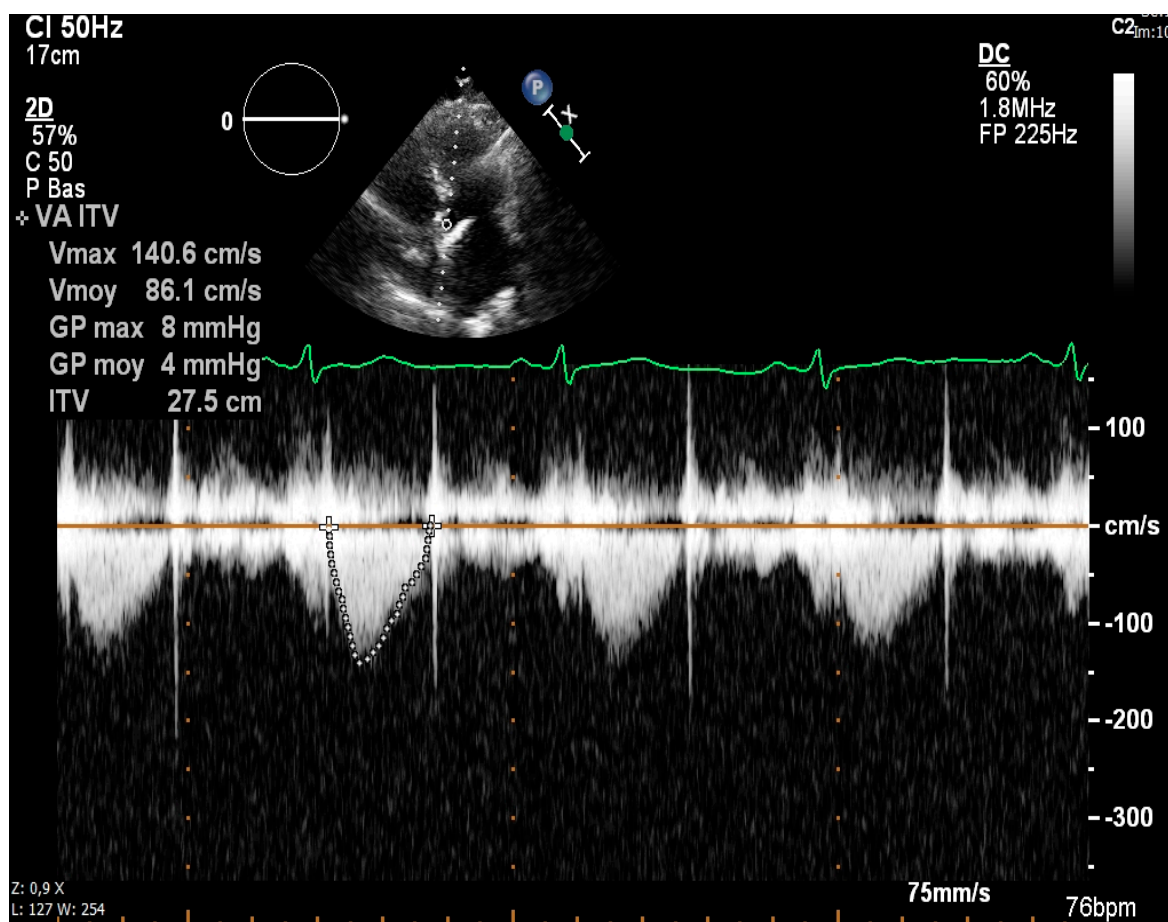

**Figure S2.** Transthoracic echocardiography 3 week after anticoagulation shows complete normalisation of transvalvular gradient.

**Publisher's Note:** MDPI stays neutral with regard to jurisdictional claims in published maps and institutional affiliations.

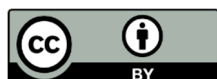

© 2020 by the authors. Submitted for possible open access publication under the terms and conditions of the Creative Commons Attribution (CC BY) license (<http://creativecommons.org/licenses/by/4.0/>).
